# Supplementary material
Source: PubMed Central journal article supplement (PMC4249359)

**Figure 1S. Scatterplots of Minimum Neutrophil Counts Versus Tedizolid Exposure Measures**

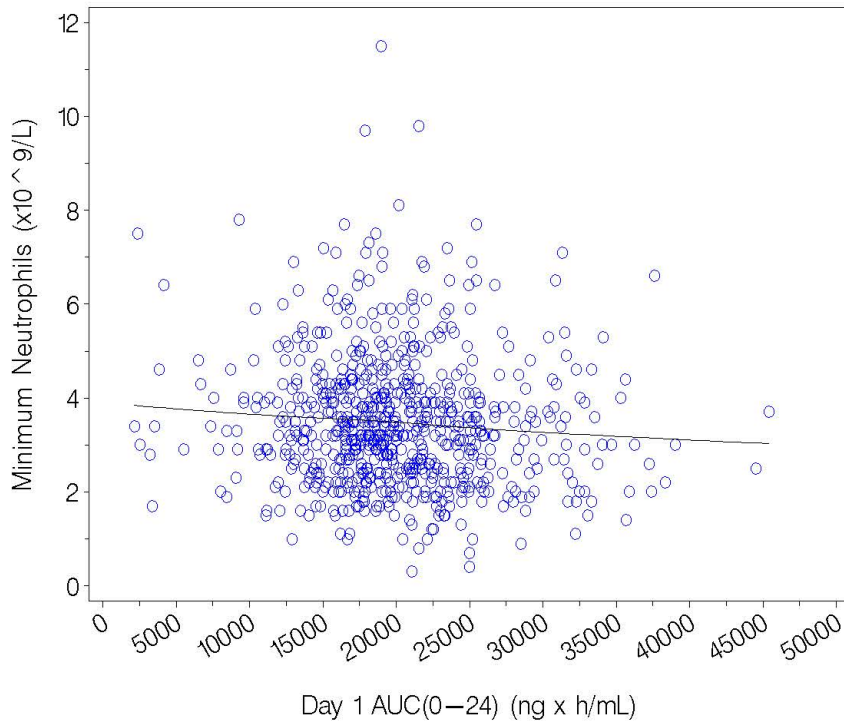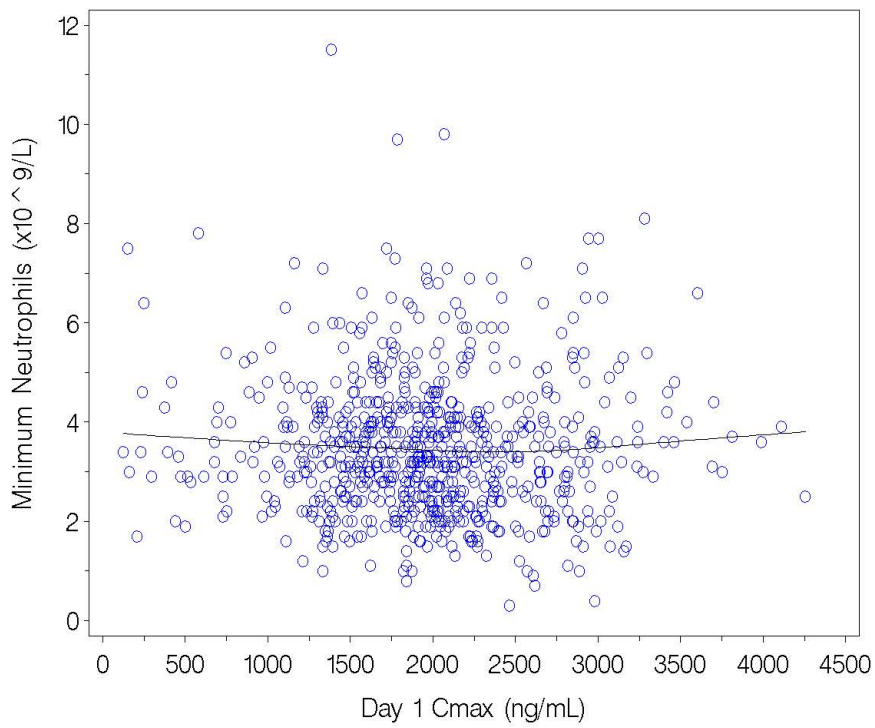

**Figure 1S. Scatterplots of Minimum Neutrophil Counts Versus Tedizolid Exposure Measures (Continued)**

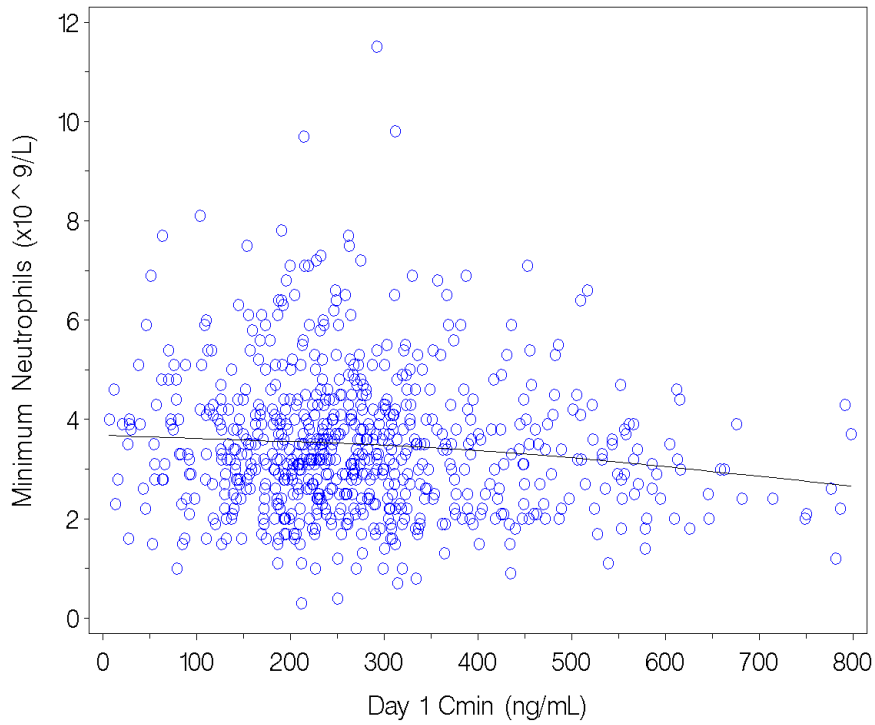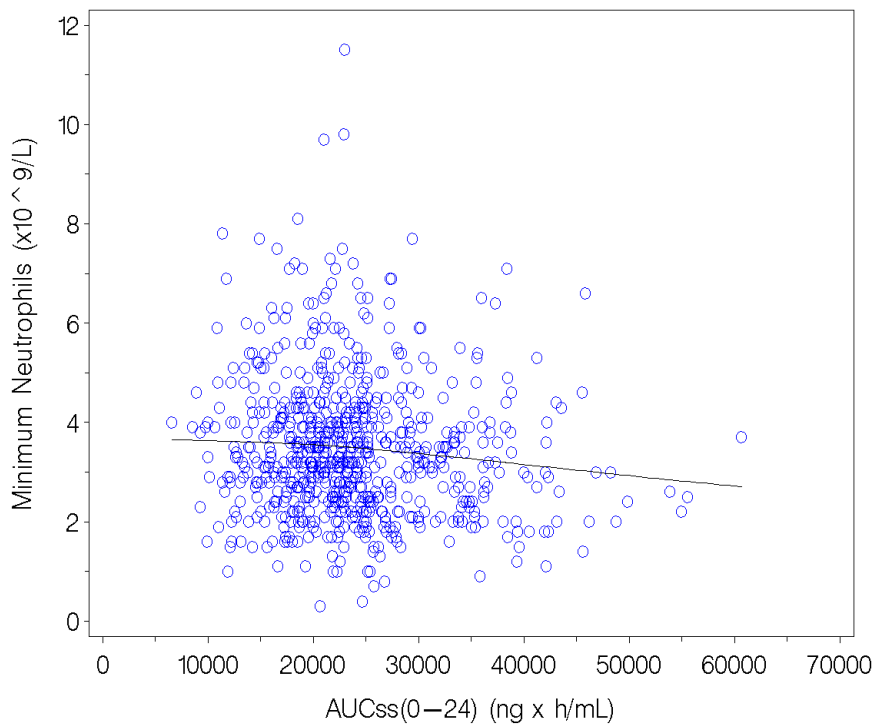

**Figure 1S. Scatterplots of Minimum Neutrophil Counts Versus Tedizolid Exposure Measures (Continued)**

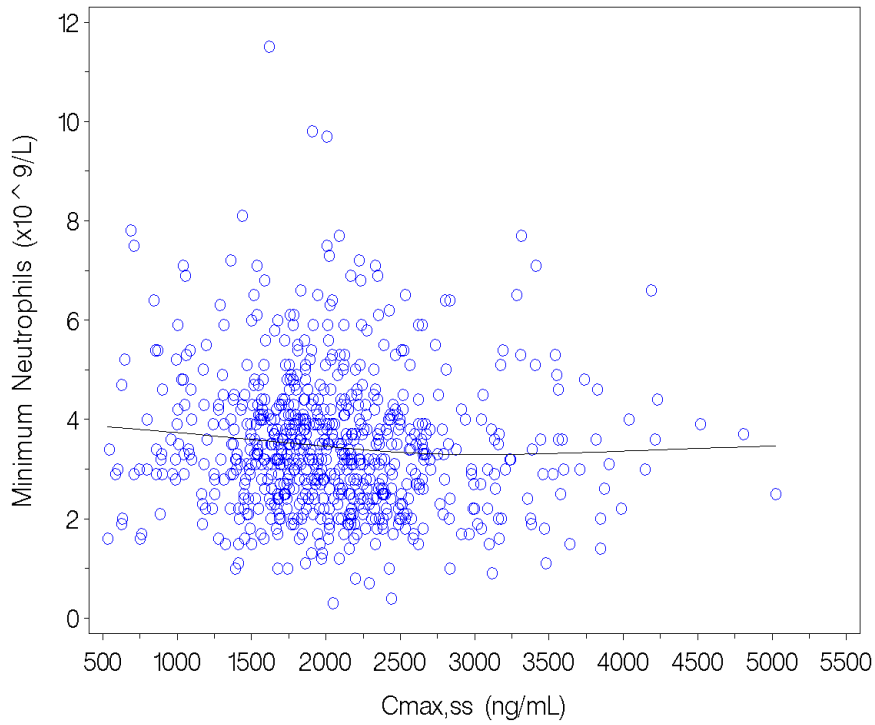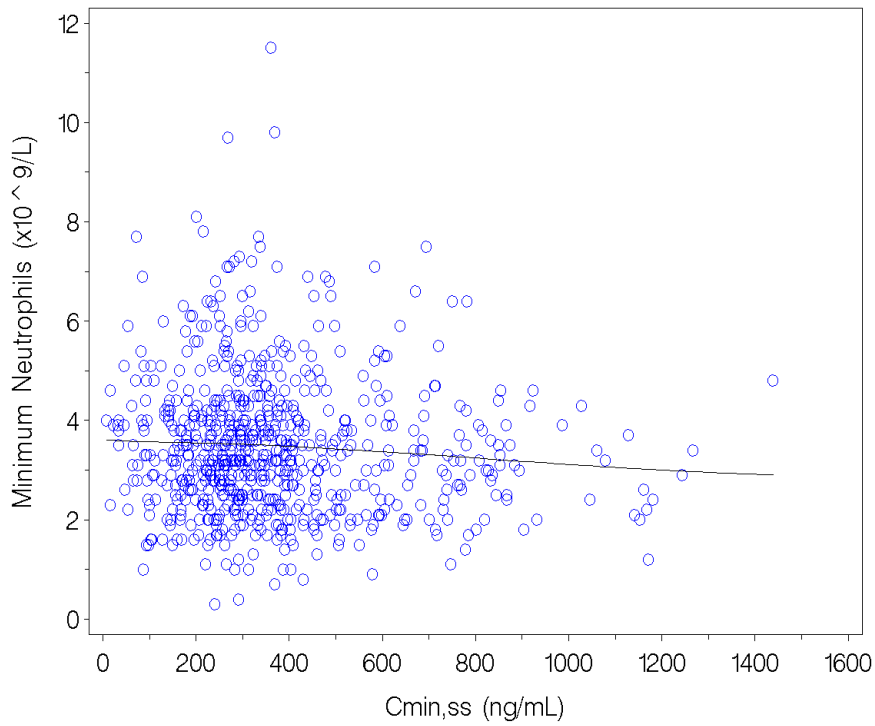

**Figure 2S. Scatterplots of Maximum Decrease in Neutrophil Counts From Baseline Versus Tedizolid Exposure Measures**

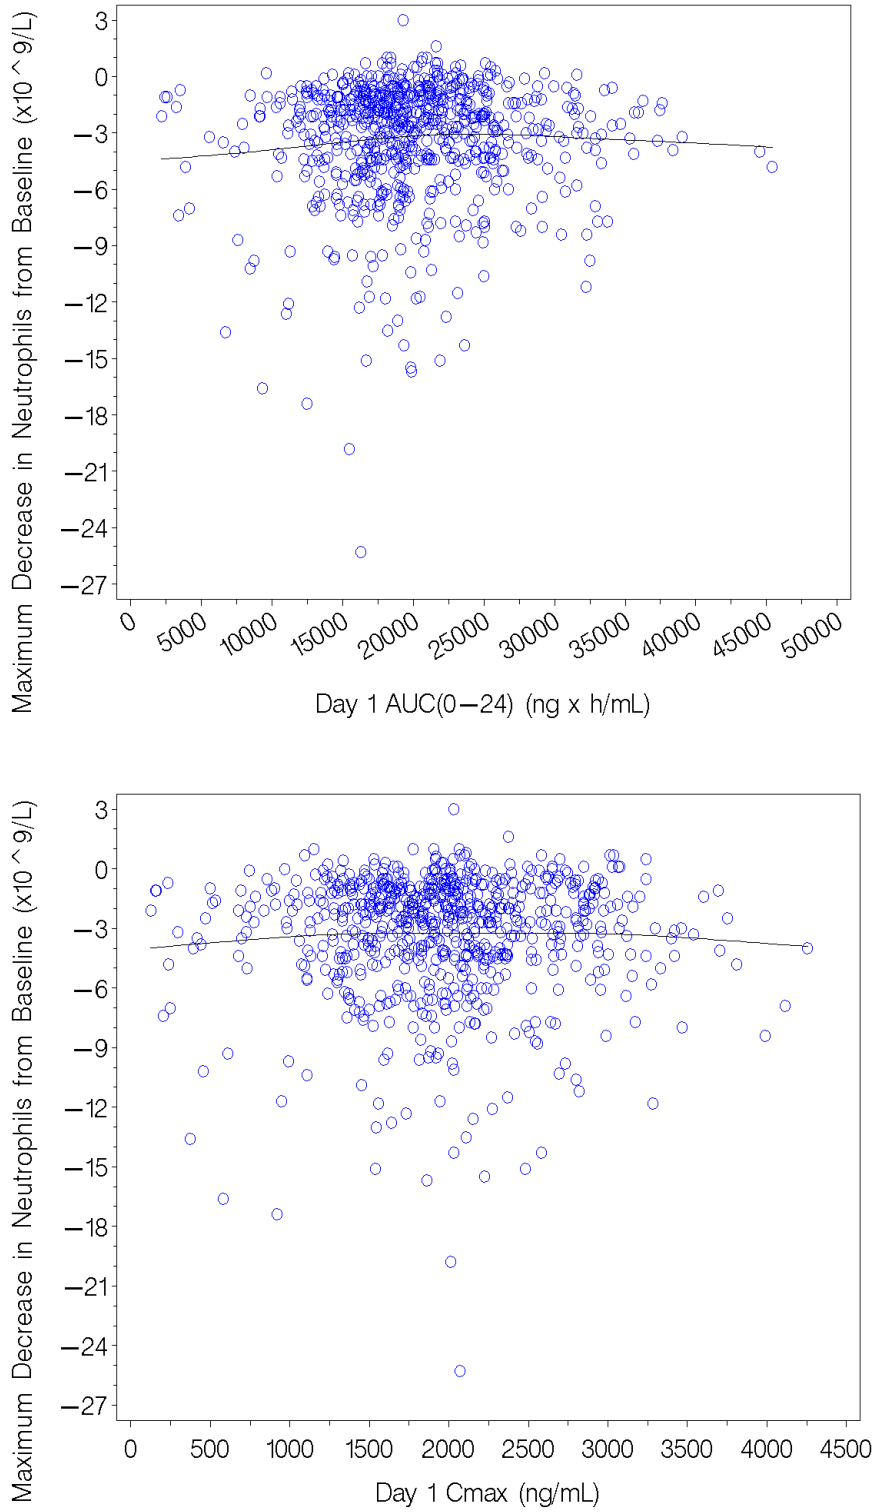

**Figure 2S. Scatterplots of Maximum Decrease in Neutrophil Counts From Baseline Versus Tedizolid Exposure Measures (Continued)**

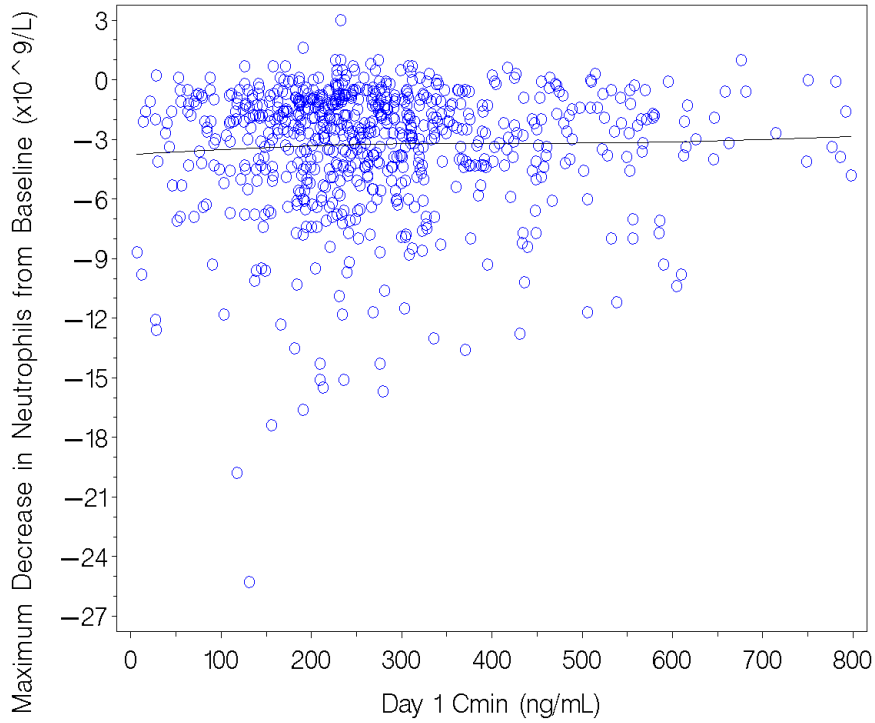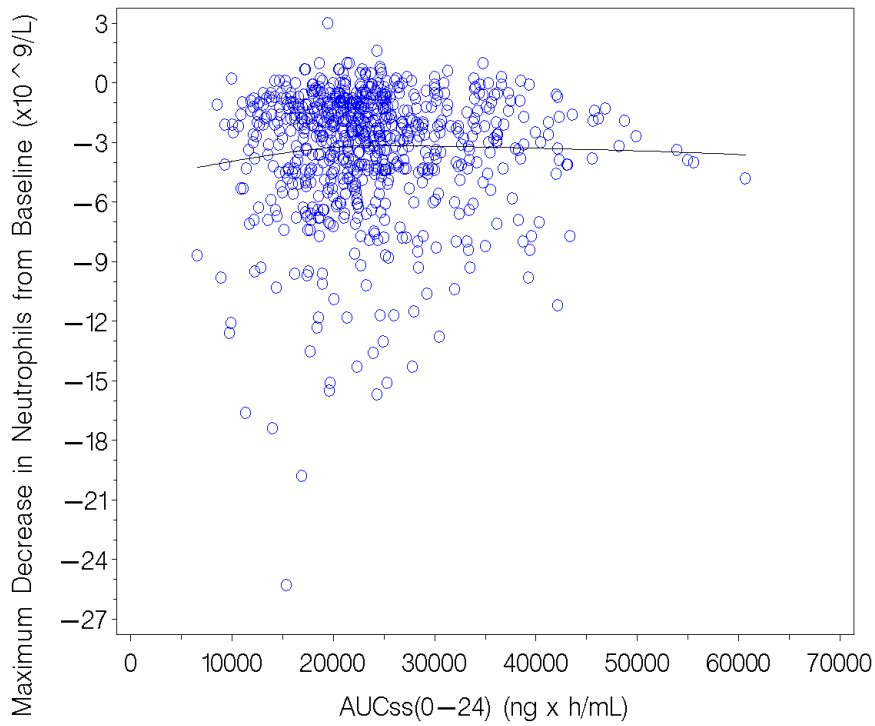

**Figure 2S. Scatterplots of Maximum Decrease in Neutrophil Counts From Baseline Versus Tedizolid Exposure Measures (Continued)**

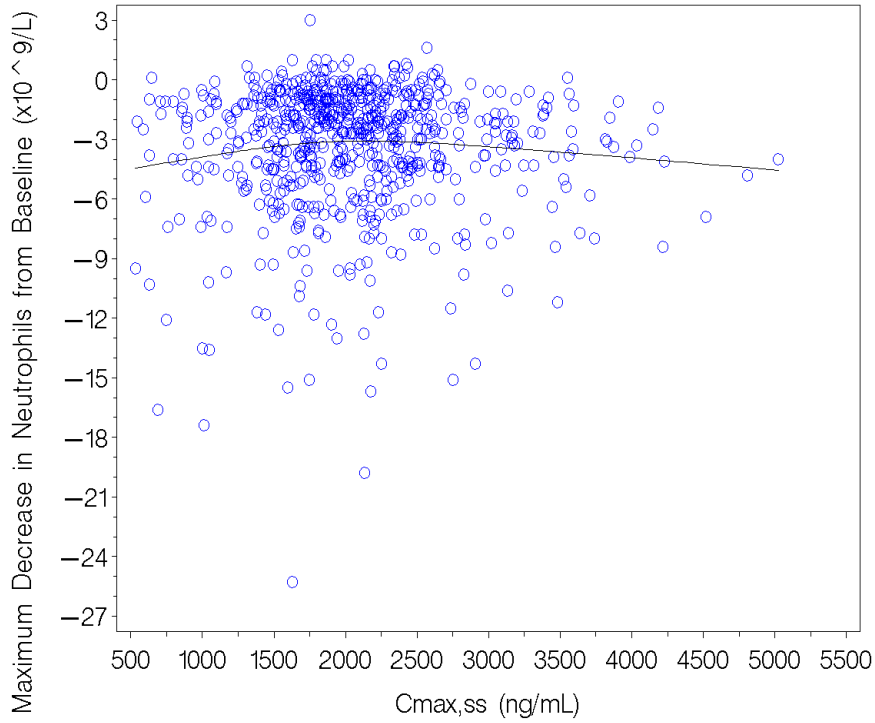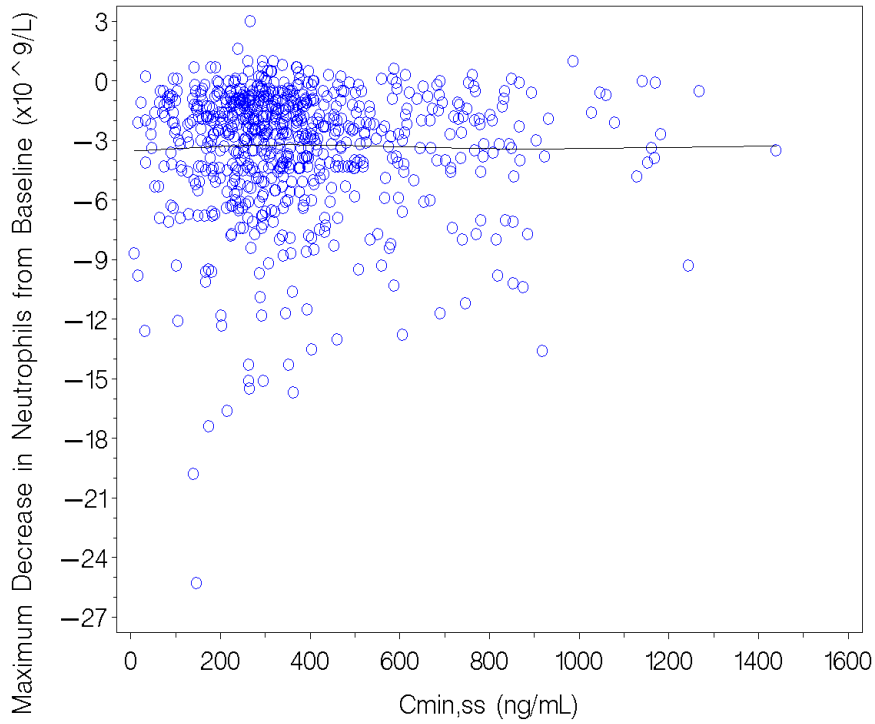

**Figure 3S. Scatterplots of Minimum Platelet Counts Versus Tedizolid Exposure Measures**

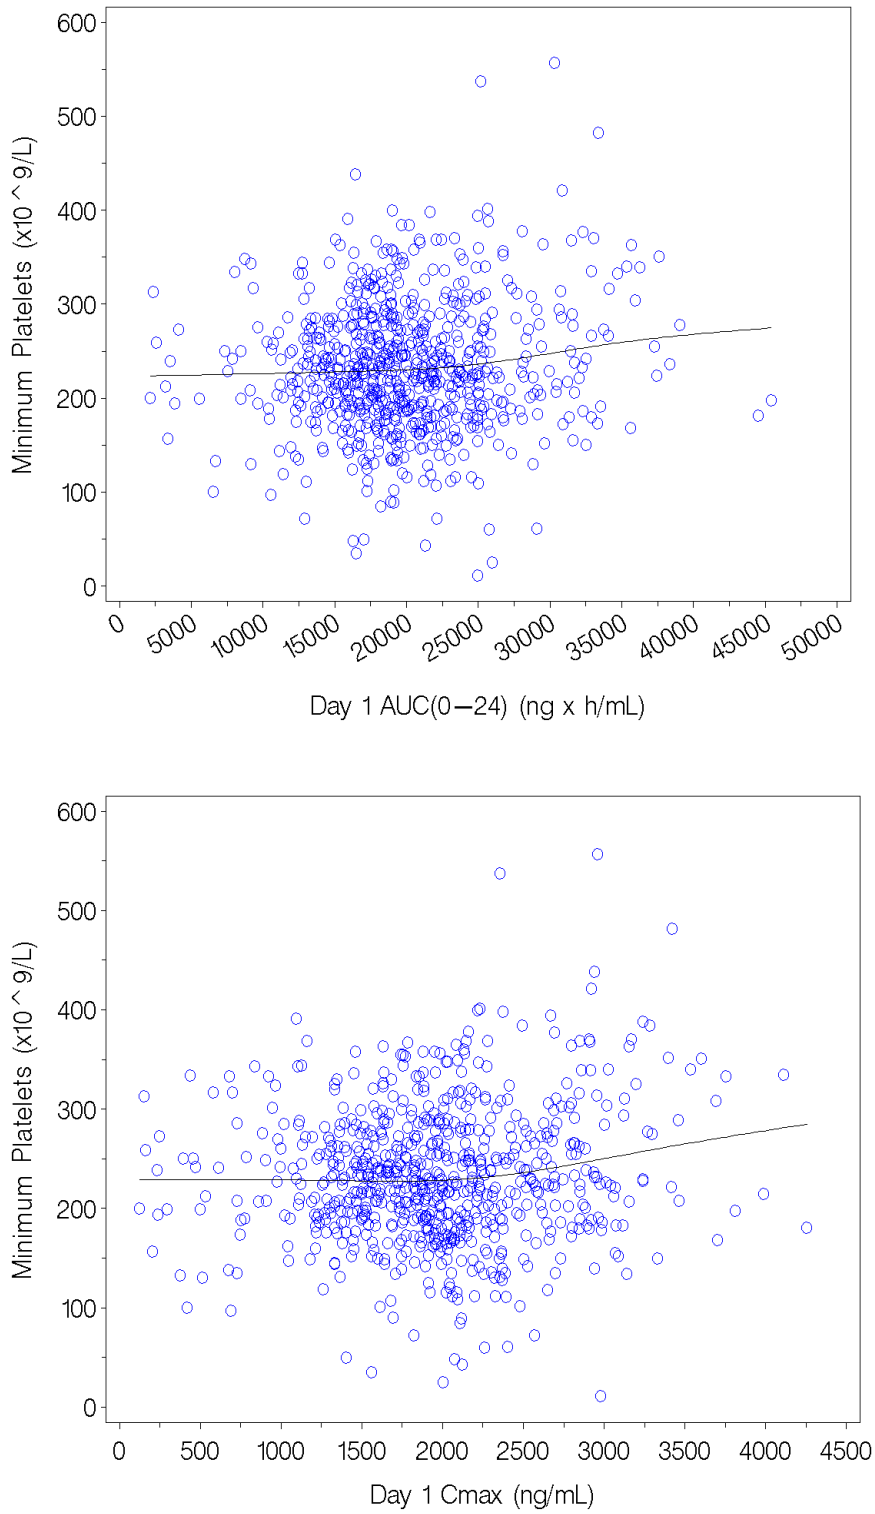

**Figure 3S. Scatterplots of Minimum Platelet Counts Versus Tedizolid Exposure Measures (Continued)**

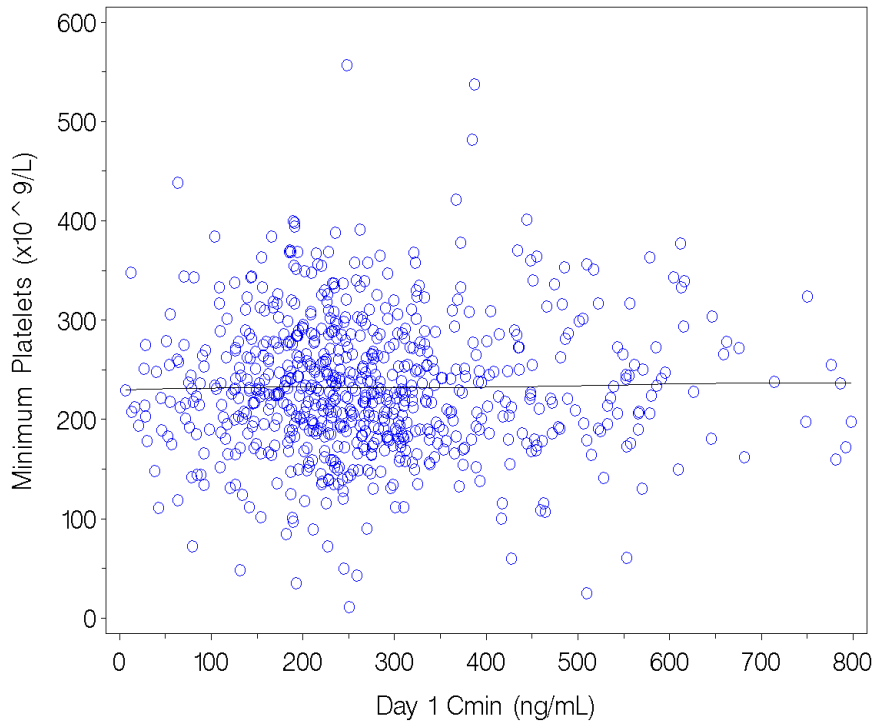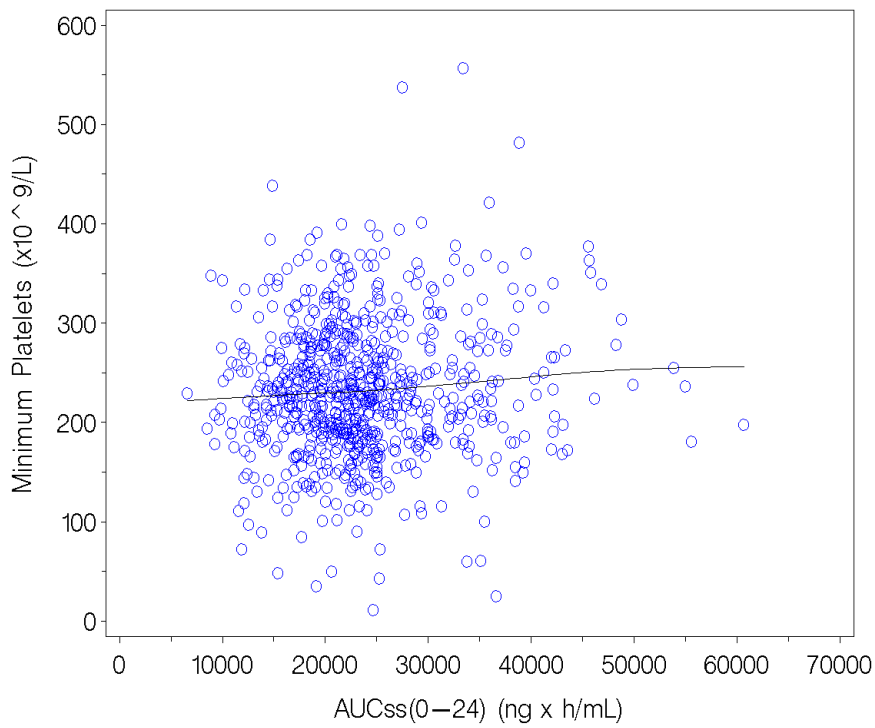



**Figure 3S. Scatterplots of Minimum Platelet Counts Versus Tedizolid Exposure Measures (Continued)**

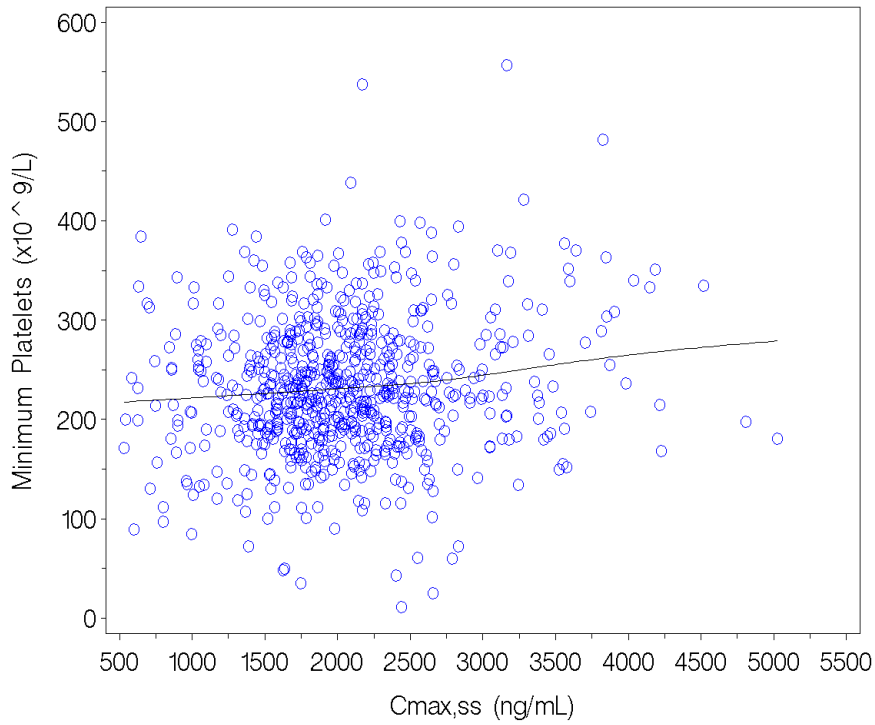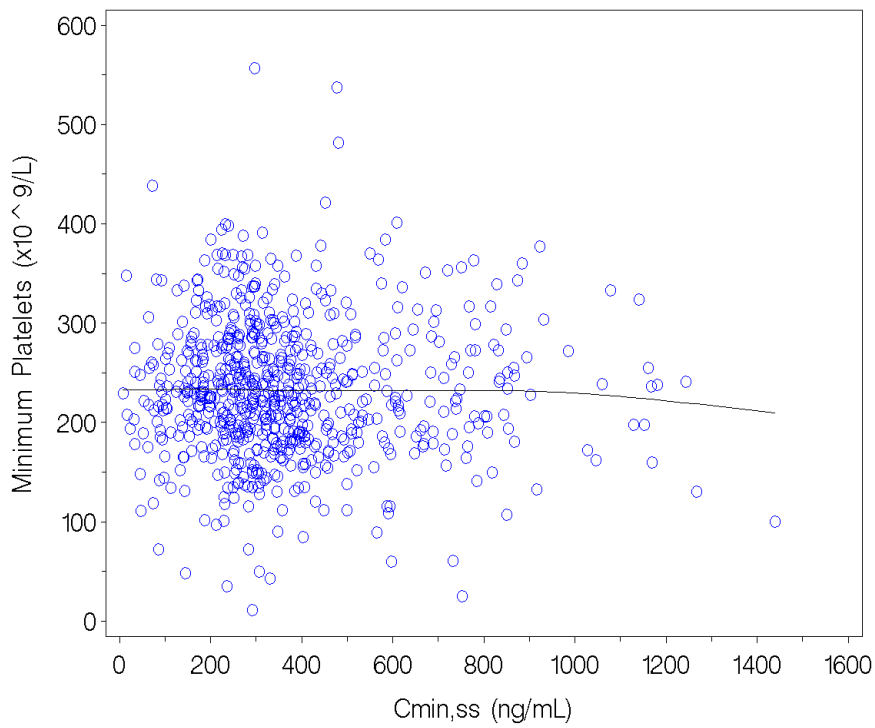

**Figure 4S. Scatterplots of Maximum Decrease in Platelet Counts From Baseline Versus Tedizolid Exposure Measures**

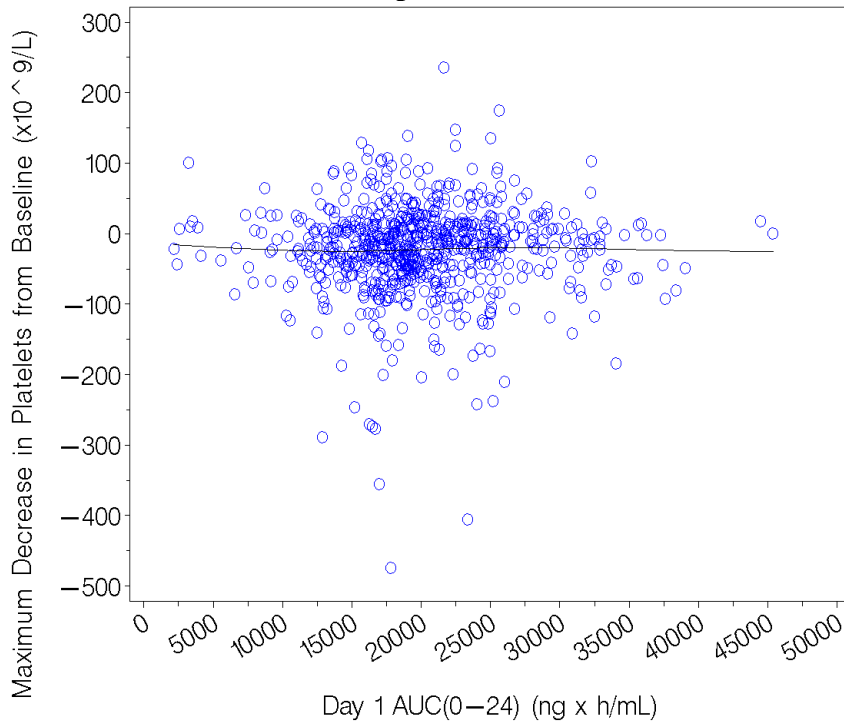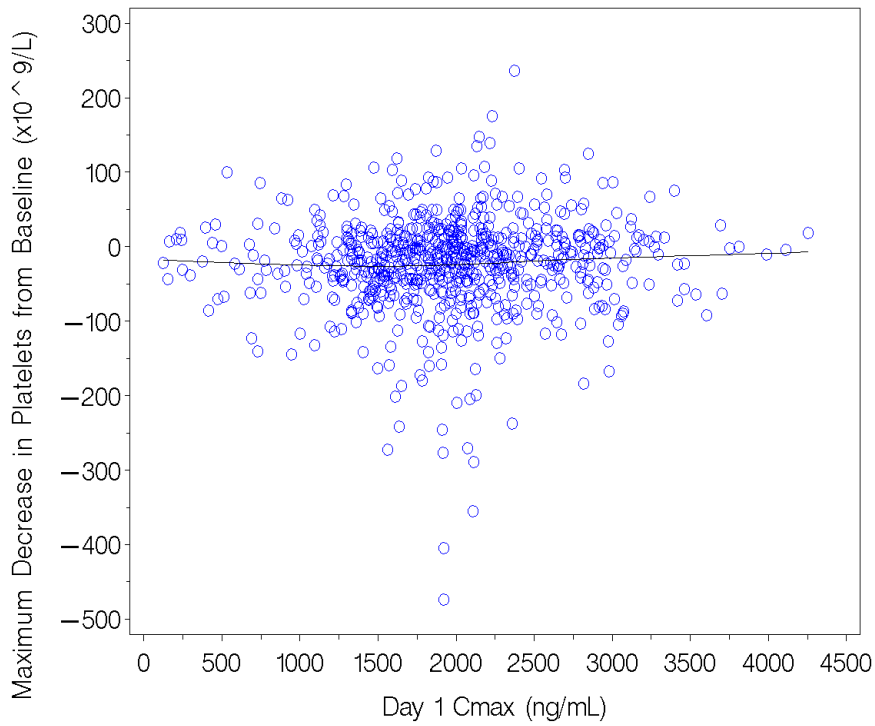

**Figure 4S. Scatterplots of Maximum Decrease in Platelet Counts From Baseline Versus Tedizolid Exposure Measures (Continued)**

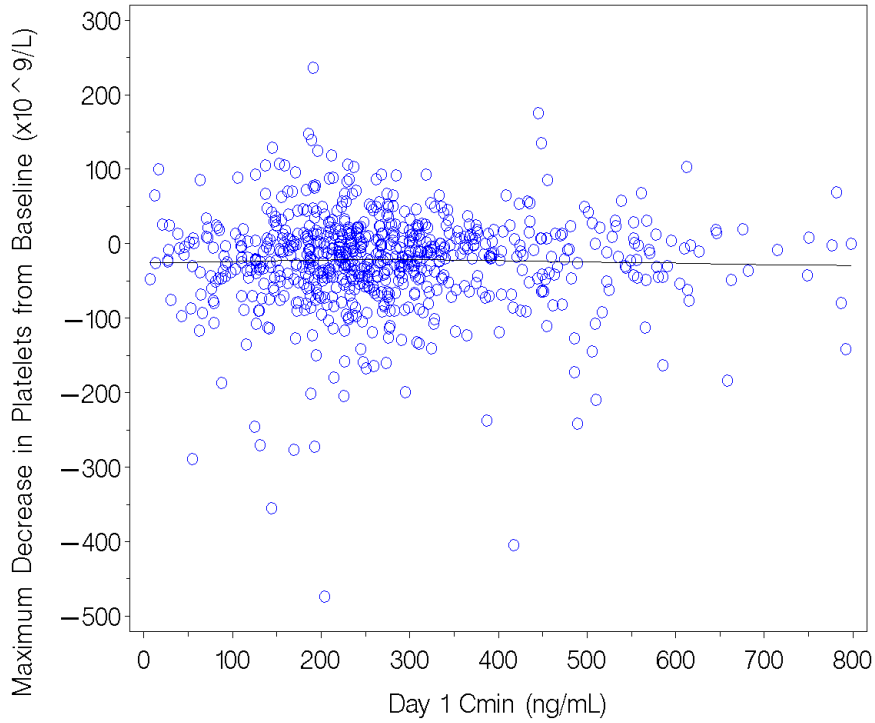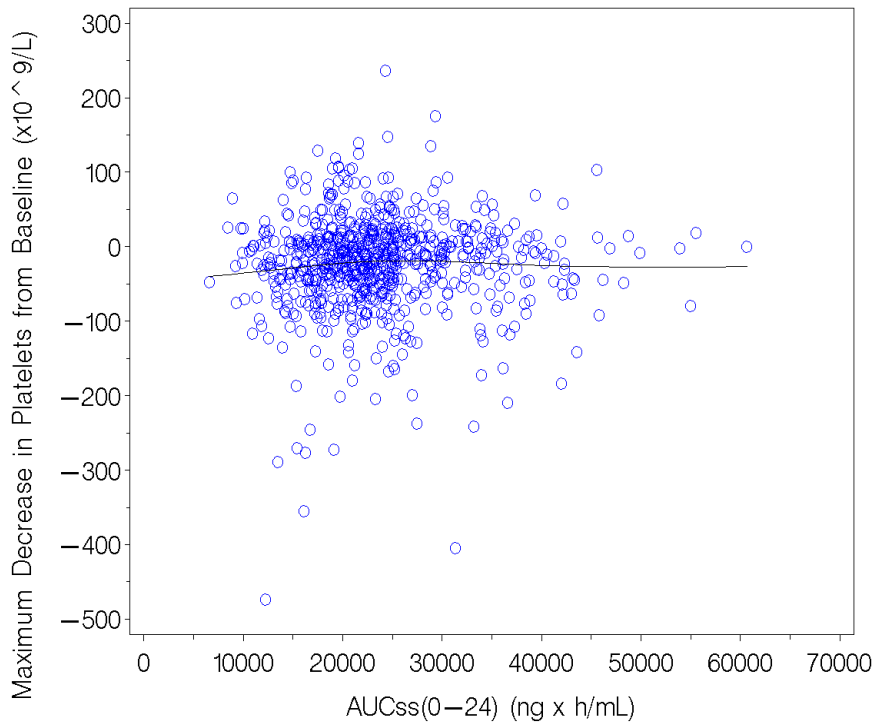

**Figure 4S. Scatterplots of Maximum Decrease in Platelet Counts From Baseline Versus Tedizolid Exposure Measures (Continued)**

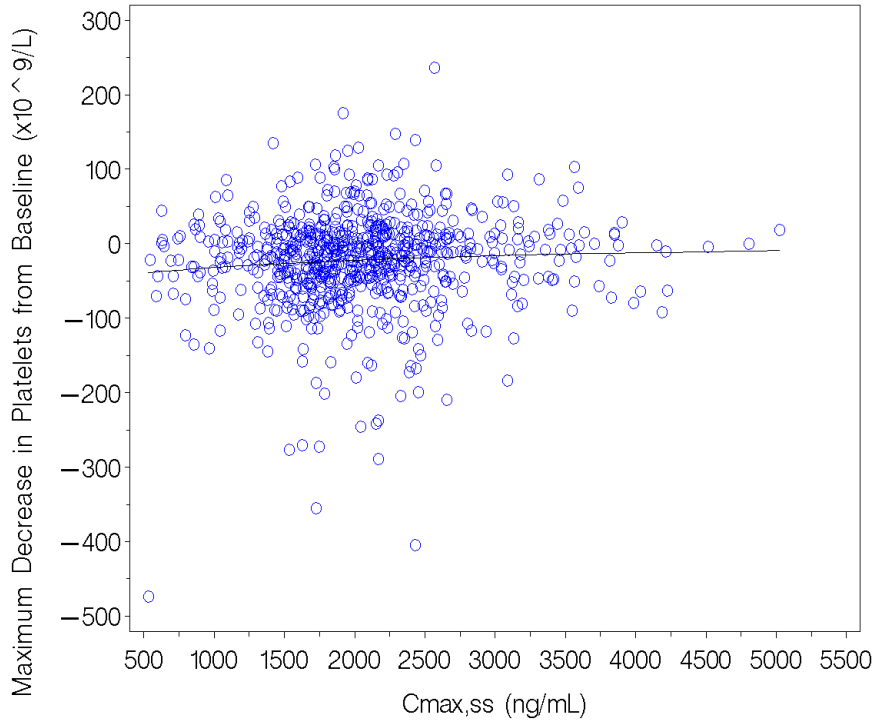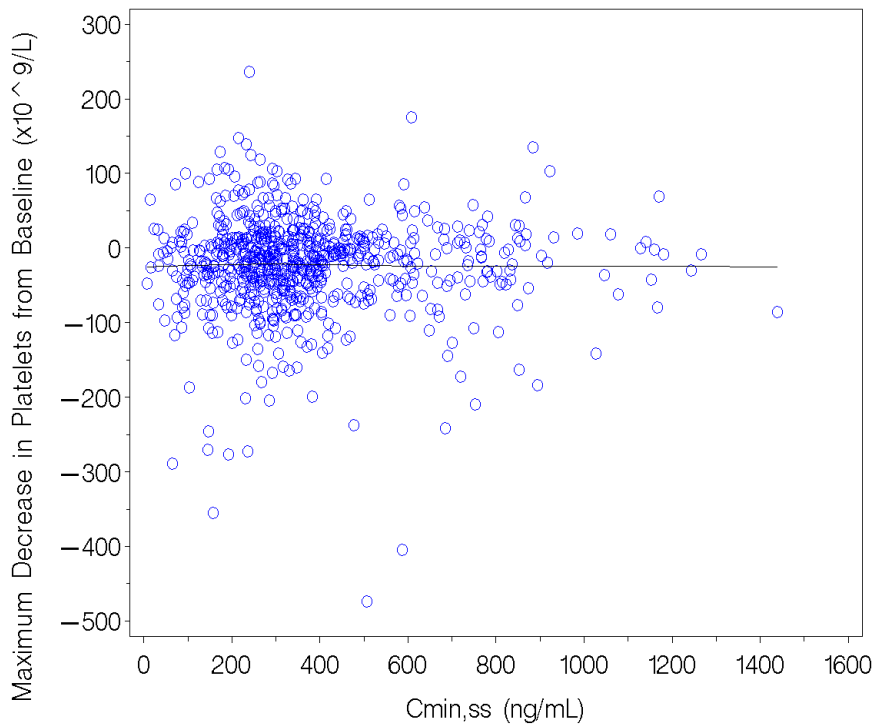

Supplement: AAC.03423-14_zac011143384so1.pdf [file AAC.03423-14_zac011143384so1.pdf]
